# Supplementary material for: Biodegradable Nanoparticles-Loaded PLGA Microcapsule for the Enhanced Encapsulation Efficiency and Controlled Release of Hydrophilic Drug
Source: PubMed Central journal article supplement (PMC7998393; doi:10.3390/ijms22062792), 2021-03-10
Supplement: ijms-22-02792-s001.pdf [file ijms-22-02792-s001.pdf]

[Supportin Information]

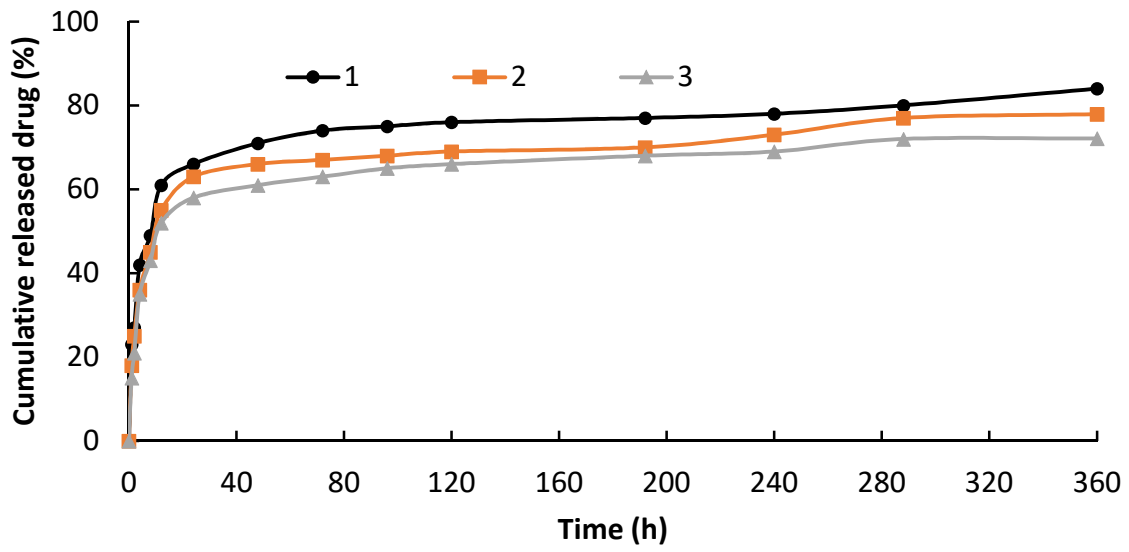

Figure S1. The cumulative release profile of MET from PLGA MPs (three replicates).

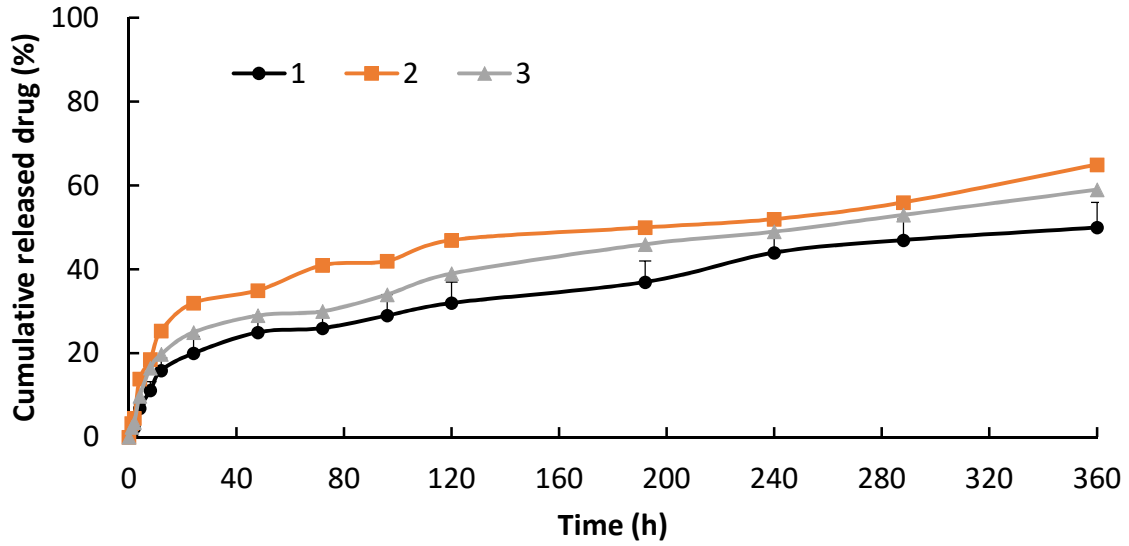

Figure S2. The cumulative release profile of MET from alginate NPs in MCs (three replicates).

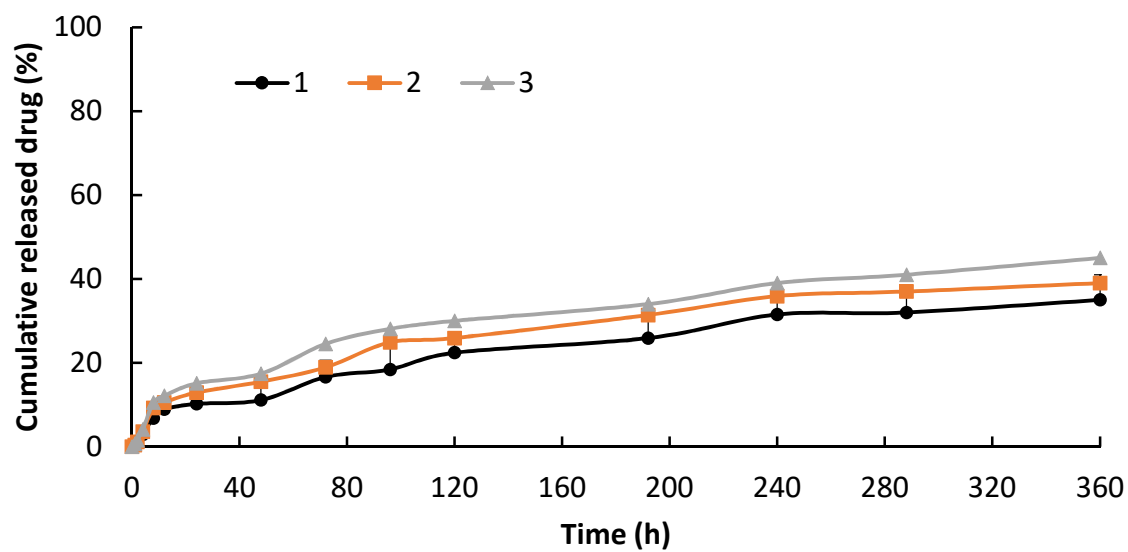

**Figure S3.** The cumulative release profile of MET from alginate-coated with chitosan NPs in MCs (three replicates).

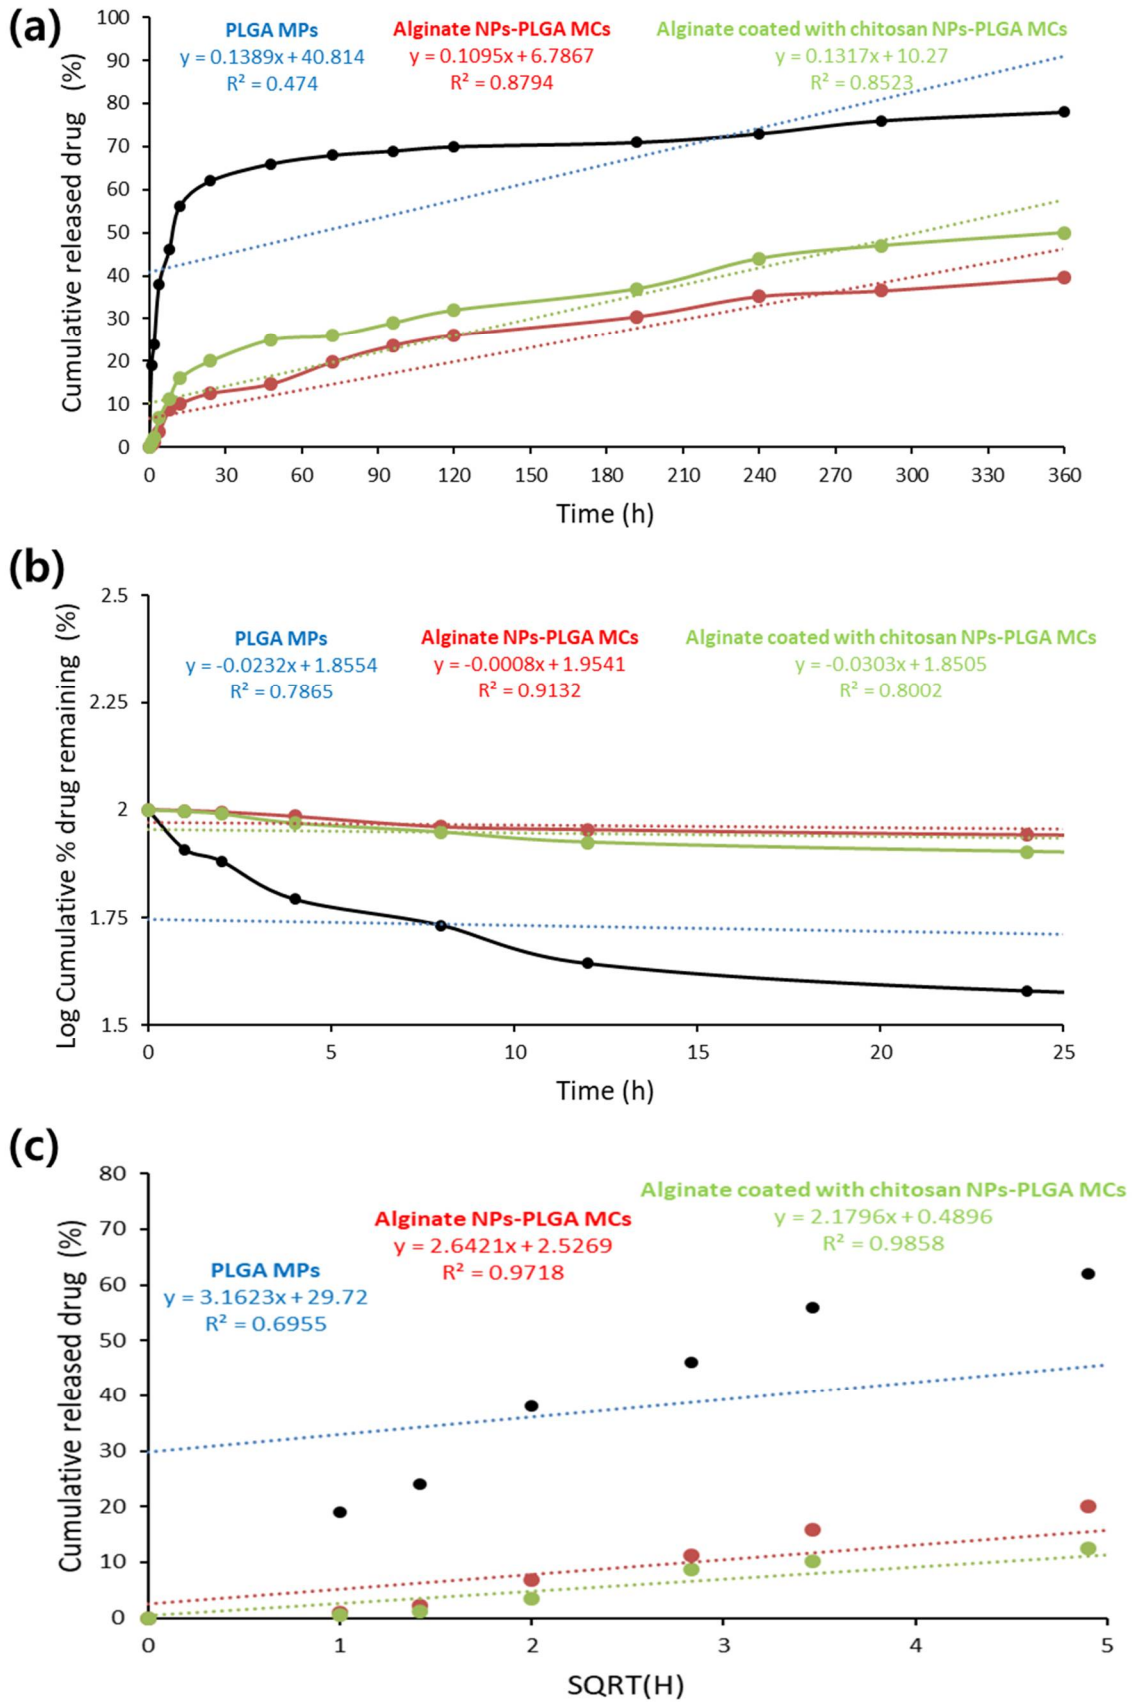

**Figure S4.** Kinetic analysis of drug release: (a) zero-order kinetics, (b) first-order kinetics, and (c) Higuchi kinetics.
